# Supplementary material for: Advanced Skeletal Ossification Is Associated with Genetic Variants in Chronologically Young Beef Heifers
Source: MDPI journal article supplement (doi:10.3390/genes14081629), 2023-08-15
Supplement: s1 [file s1]

Table S1: Primer and probe sequences designed for custom TaqMan MGB Allelic Discrimination Assays. Probes are listed with the dyes used for each probe which are listed as VIC and FAM. The target is named starting with the gene name and then followed by SNP with chromosome and base pair location.

| Gene                               | Primer                                               | Probe                                    |
|------------------------------------|------------------------------------------------------|------------------------------------------|
| <i>ALPL</i><br>SNP_2:1318372<br>01 | Forward Primer:<br>CGTGCTAAGTCACTTCAGTCATGTC         | Probe 1 (VIC):<br>ACTCTGTGATCCTACG<br>GA |
|                                    | Reverse Primer:<br>CCCAGATCAAAGAAAAGAGTAAGATA<br>AAT | Probe 2 (FAM):<br>CTGTGATCCTACAGAC<br>T  |
| <i>ESR1</i><br>SNP_9:9011565<br>0  | Forward Primer:<br>AAAAGTGATGGTGTCCCTTGAAA           | Probe 1 (VIC):<br>CTCAGGACGCCAGA         |
|                                    | Reverse Primer:<br>CCCAAGGCTCTGTAAAAGATTAACC         | Probe 2 (FAM):<br>CTCAGGGCGCCAGAT        |
| <i>ESR1</i> SNP<br>_9:90015095     | Forward Primer:<br>CAAGAGATGAACAAATAAACCAGCAA        | Probe 1 (VIC):<br>AGGTTGAAATCAGGTC<br>T  |
|                                    | Reverse Primer: AGGTTGAAATCAGGCCT                    | Probe 2 (FAM):<br>AGGTTGAAATCAGGCC<br>T  |

Table S2: Custom primer designs used in targeted gene sequencing for locations. Primer target lists the gene of interested that was intended for sequencing. Some targets had two primer sets designed for it and that is denoted in the title after the gene name as “Set 1” or “Set 2”.

| Primer Target        | Primer Pair Sequence                                                                                 |
|----------------------|------------------------------------------------------------------------------------------------------|
| <i>OSTERIX Set 1</i> | Forward Primer: 5'-AGACAAGACACTGCTTAGGGTGAGT- 3'<br>Reverse Primer: 5'-TCTCTCTCCCACTCCTCTCTCTTCA -3' |
| <i>OSTERIX Set 2</i> | Forward Primer: 5'-GACTGCCCTCTCCTTTCTCTCATTG -3'<br>Reverse Primer: 5'-ATGTACTCACTGTTGCCCACTGCCC -3' |
| <i>COL10A1</i>       | Forward Primer: 5'-CTGAAATTCAGATTACAACATGTTT-3'<br>Reverse Primer: 5'-CAAATACGCTGACATGGAGGTCTAC-3'   |
| <i>PTHLH Set 1</i>   | Forward Primer: 5'-AAAAATTGGCTCTGTTCCAAGACAG-3'<br>Reverse Primer: 5'-GCTGAAGACAATTTCCAGAAATACAT-3'  |
| <i>PTHLH Set 2</i>   | Forward Primer: 5'-TCCTCTCCTTTAAAAGTTAGCCCTT-3'<br>Reverse Primer: 5'-AGCAGACTAATGTTTTGTCTAGCAC-3'   |
| <i>RUNX2 Set 1</i>   | Forward Primer: 5'-AGGGTGGTAATGAGAAAAGATAGCC-3'<br>Reverse Primer: 5'-AGCACCATAAATGCAAGAGTATAGT-3'   |
| <i>RUNX2 Set 2</i>   | Forward Primer: 5'-AAGTTTAGGGAGGTGGGAAAACAT-3'<br>Reverse Primer: 5'-CCATGTGTTATCTATGGTTTTGTTT-3'    |
| <i>RUNX2 Set 3</i>   | Forward Primer: 5'-CAAGTTTAGGGAGGTGGGAAAACAT-3'<br>Reverse Primer: 5'-CCATGTGTTATCTATGGTTTTGTTT-3'   |
| <i>SOX 9</i>         | Forward Primer: 5'-GCAGTTTTAAAGTTGTTTTTAGTCA-3'<br>Reverse Primer: 5'-CTCACTTTAAGTTTTTGTCTTTAAA-3'   |
| <i>BMP2 1</i>        | Forward Primer: 5'-ATGCCTGAAACCCTGGCTTAAGCAA-3'<br>Reverse Primer: 5'-CATGCCTTTTGGCCTCATCTTCCCC-3'   |
| <i>ESR2 Set 1</i>    | Forward Primer: 5'-TCCACAGTGGCTGTGTCATT – 3'<br>Reverse Primer: 5'-GACCTATGACCTCTGTCCATCAA -3'       |
| <i>ESR2 Set 2</i>    | Forward Primer: 5'-GAGACCCCAGTTCGATTCCT -3'<br>Reverse Primer: 5'-GACTCTGTGACCCCATGGAC -3'           |
| <i>GHR</i>           | Forward Primer: 5'-ATCCCTCCTCCAACCCTCTC-3'<br>Reverse Primer: 5'-AGCAACAAGGATGCAACTAAAGA-3'          |

Table S3. Summary of SNPs that were identified in target genes and were not found to be significant.

| Target Gene   | No. SNPs |
|---------------|----------|
| GHR           | 13       |
| PTHLH         | 1        |
| RUNX2         | 2        |
| SP7 (Osterix) | 1        |
